# Supplementary material for: Immunogenicity of a New Enhanced Tetanus-reduced Dose Diphtheria-acellular Pertussis (Tdap) Vaccine Against Bordetella Pertussis in a Murine Model
Source: Research Square preprint supplement (doi:10.21203/rs.3.rs-127484/v1), 2020-12-16
Supplement: Supplementary file 1 [file 8a4930963bf9fb1775d12ef9.xlsx]

## Sheet: cytokine secretion raw data
	Group	stimulator	INF-γ					IL-17					IL-5
		pg/mL	1	2	3	4	5	1	2	3	4	5	1	2	3	4	5
	Neg	hBp	6587.71	5167.45	6088.32	15839	2574.17	950.906	1028.22	1112.08	924.401	1601.89	16.1673	18.5249	20.1226	36.1515	15.3926
		hBp+antigen	2035.06	5176.58	5725.11	13040.9	3205.49	903.551	705.687	827.006	1121.37	1442.77	11.6112	16.1673	24.1998	28.8081	15.3926
		antigen	213.872	138.327	1589.61	178.272	165.506	38.92	249.719	175.716	138.893	781.279	12.3544	11.9819	11.6112	43.2775	13.1043
		media (negative control)	127.932	94.9789				7.21317	47.9468				9.42604	9.06876
		PWM (positive control)	16344.7	16528.1	17282.4			833.176	1402.08	591.82			1495.02	1229.98	1916.56
	Positive	hBp	12548.6	12560.9	13514.3	12154.5	14439.3	1119	1080.73	1027.48	1807.67	1222.47	20.7874	37.7251	24.4412	19.7279	55.0794
		hBp+antigen	11010.3	16202.5	13072.3	13922.8	14719.6	595.348	655.332	271.261	302.812	418.147	1507.49	1871.2	1118.25	1158.15	1652.54
		antigen	5360.4	2844.76	2953.3	4138.02	5977.6	84.3082	73.8212	203.142	63.0364	116.302	1721.64	2454.28	2158.84	1793.05	2240.06
		media (negative control)	223.115	973.094				133.661	245.774				41.6478	39.0192
		PWM (positive control)	16128.2	16855.8	16876.4			550.052	721.877	1753.54			1575.73	2078.58	2671.37
	GC3111	hBp	11523.4	11010.4	15365.3	10308	11565.5	1074.67	1610.86	1200.87	988.091	1521.67	71.3795	63.7452	25.1018	139.139	57.7458
		hBp+antigen	16924.4	14212.6	16209.3	13229.6	15685	611.455	479.796	483.908	519.736	991.112	1696.55	1027.63	794.501	1557.57	1256.74
		antigen	5791.44	3653.45	2759.66	1946.24	3236.54	80.518	126.097	88.6432	79.4428	137.601	1274.23	1460.65	1944.37	1998.2	1605.99
		media (negative control)	3136.01	520.612				213.438	204.867				80.2004	61.7344
		PWM (positive control)	17247.9	17782.4	17448.5			724.21	919.524	504.536			2318.77	1903.27	2340.92
	enhanced GC3111	hBp	14772	13967.8	11983.5	14342	6093.15	1498.43	1189.99	1288.59	2142.02	1336.62	53.1771	32.2685	45.7105	35.3861	31.3935
		hBp+antigen	15805.4	14817.8	15484.9	12443.5	9848.64	925.333	477.824	236.772	466.159	469.071	1385.33	1057.48	1533.33	829.215	1109.26
		antigen	3788.02	1775.89	5739.3	7631.46	2061.64	120.205	101.79	280.287	300.707	86.6986	2375.35	1830.62	1837.81	1160.51	1575.83
		media (negative control)	1891.01	3381.47				455.348	414.534				30.0942	25.063
		PWM (positive control)	15852.4	15544.8	16807.9			704.135	1023.88	1127.9			2136.81	1888.41	1821.99

## Sheet: cytokine secretion mean SEM 
		stimulator	Neg			Control			GC3111			GC3111 enhanced			3 group	3 group-media	Neg-media	3 group-negative control
		pg/mL	mean	SEM	n	mean	SEM	n	mean	SEM	n	mean	SEM	n	mean	mean	mean	mean
	INF-γ	hBp	7251.32	2255.65	5	13043.5	414.619	5	11954.5	882.41	5	12231.7	1607.23	5	12409.9	10722.3	7139.87	3582.48
		hBp+antigen	5836.63	1919.95	5	13785.5	864.395	5	15252.1	673.472	5	13680	1124.24	5	14239.2	12551.7	5725.17	6826.51
		antigen	457.118	283.384	5	4254.82	627.939	5	3477.47	644.336	5	4199.26	1112.72	5	3977.18	2289.63	345.663	1943.97
		media	111.455	16.475	2	598.105	374.985	2	1828.31	1307.7	2	2636.24	745.23	2	1687.55			0
		PWM	16718.4	286.944	3	16620.1	246.022	3	17492.9	155.895	3	16068.4	380.268	3	16727.1			0
	IL-17	hBp	1123.5	123.995	5	1251.47	142.666	5	1279.23	122.781	5	1491.13	170.19	5	1340.61	1062.67	1095.92	-33.246
		hBp+antigen	1000.08	129.735	5	448.58	76.7803	5	617.202	96.4327	5	515.03	112.174	5	526.937	249.001	972.498	-723.497
		antigen	276.906	130.586	5	108.122	25.3686	5	102.46	12.2392	5	177.938	46.371	5	129.507	-148.43	249.326	-397.756
		media	27.58	20.37	2	189.715	56.055	2	209.155	4.285	2	434.94	20.41	2	277.937			0
		PWM	942.36	240.188	3	1008.49	375.813	3	716.09	119.863	3	951.973	127.503	3	892.184			0
	IL-5	hBp	21.27	3.81368	5	31.554	6.70036	5	71.424	18.6778	5	39.588	4.2462	5	47.522	1.23033	12.02	-10.7897
		hBp+antigen	19.236	3.15159	5	1461.53	144.275	5	1266.6	165.771	5	1182.92	124.503	5	1303.68	1257.39	9.986	1247.4
		antigen	18.464	6.20889	5	2073.58	138.289	5	1656.69	139.044	5	1756.02	197.854	5	1828.76	1782.47	9.214	1773.26
		media	9.25	0.18	2	40.335	1.315	2	70.965	9.235	2	27.575	2.515	2	46.2917			0
		PWM	1547.19	199.908	3	2108.56	316.639	3	2187.65	142.335	3	1949.07	95.8082	3	2081.76			0
